# Supplementary material
Source: PubMed Central journal article supplement (PMC6648921)
Supplement: ao8b03671_si_001.pdf [file ao8b03671_si_001.pdf]

**Supporting Information**

**Carboxymethyl cellulose-xylan hydrogel: Synthesis,  
characterization and *in vitro* release of Vitamin B<sub>12</sub>**

Debashis Kundu <sup>1</sup> and Tamal Banerjee <sup>1,\*</sup>

<sup>1</sup> Department of Chemical Engineering, Indian Institute of Technology Guwahati, Guwahati -  
781039, Assam, India

\* Corresponding author E-mail: tamalb@iitg.ac.in

Fax: +91 361 2582291, Tel: +91 361 2582266

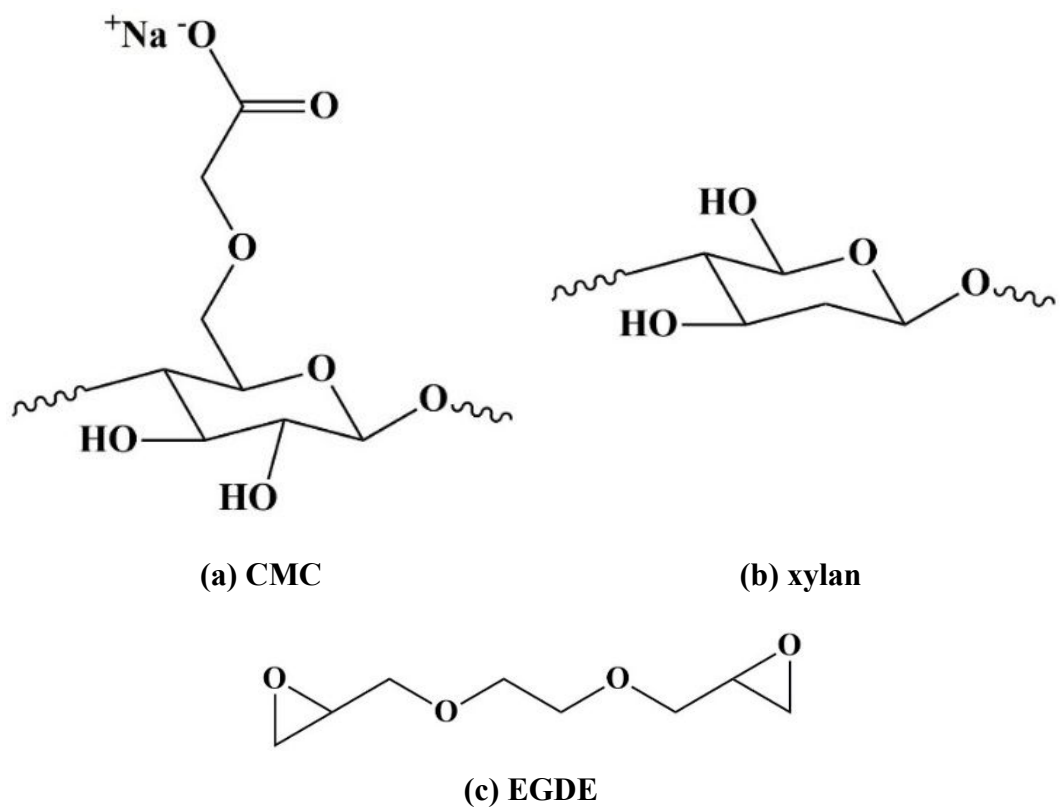

Figure S1. Structure of monomers and crosslinker, (a) CMC (b) xylan, (c) EGDE.

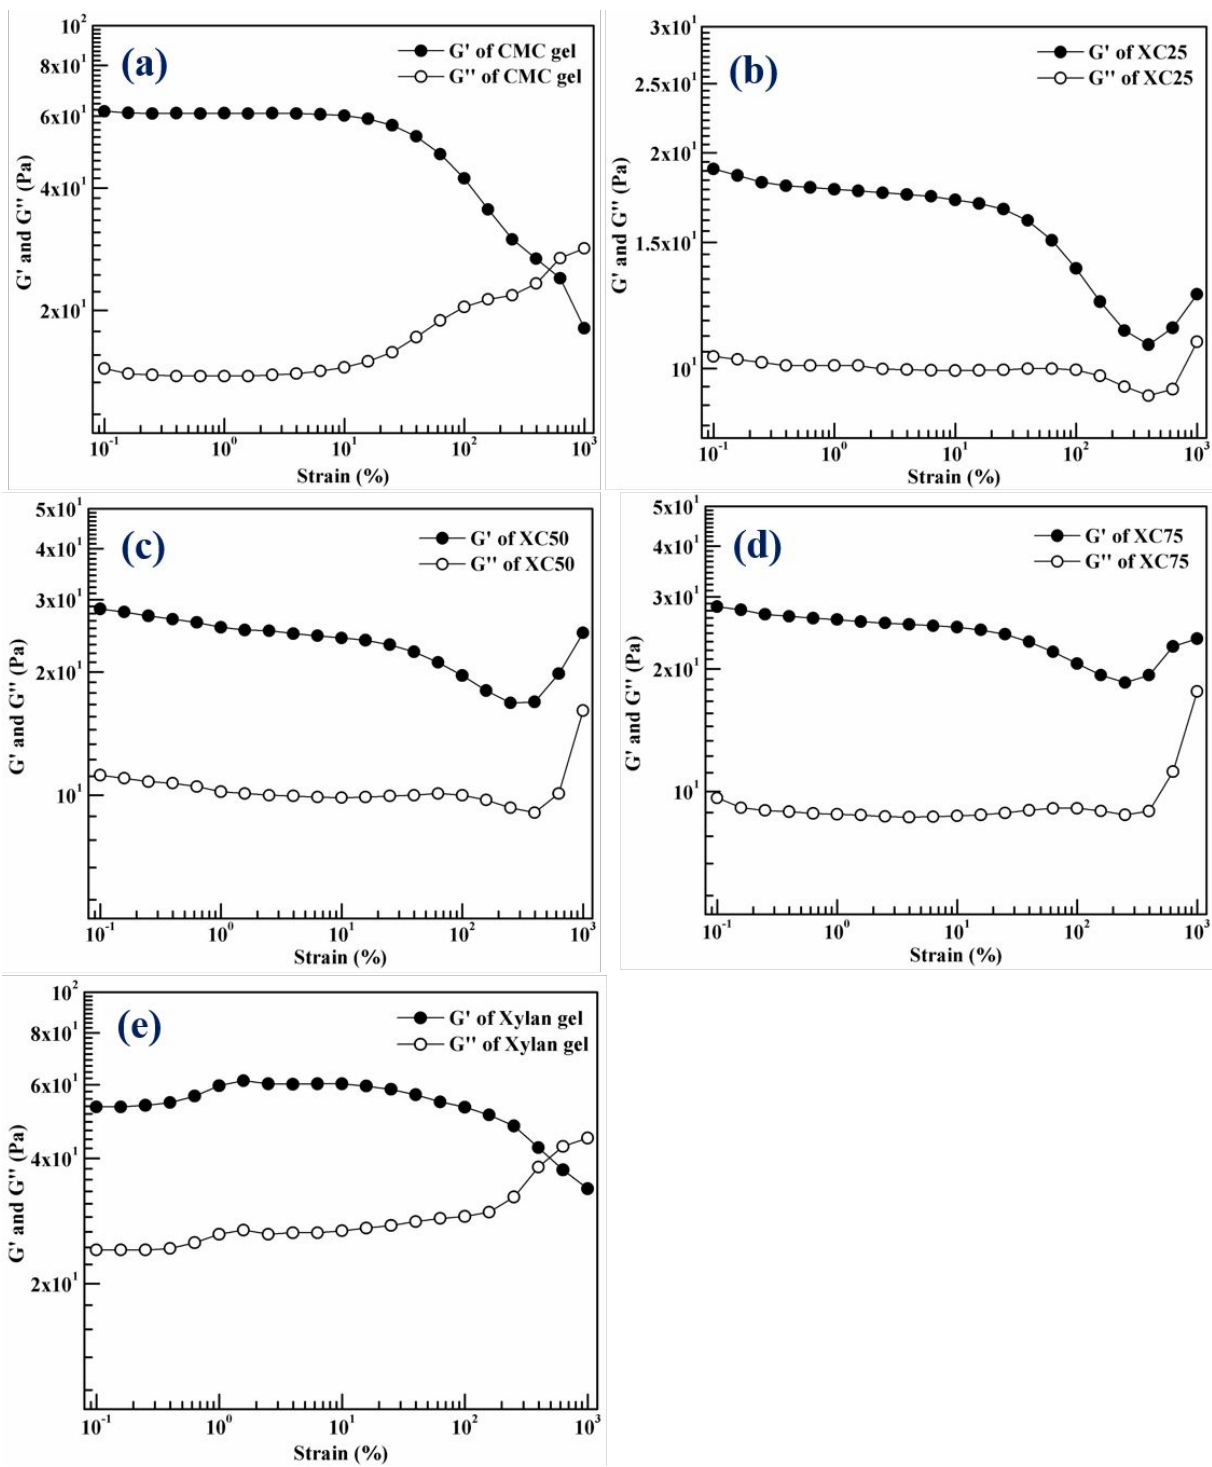

Figure S2. Amplitude sweep of CMC-xylan hydrogels. (a) CMC gel, (b) XC25, (c) XC50, (d) XC75, (e) Xylan gel.

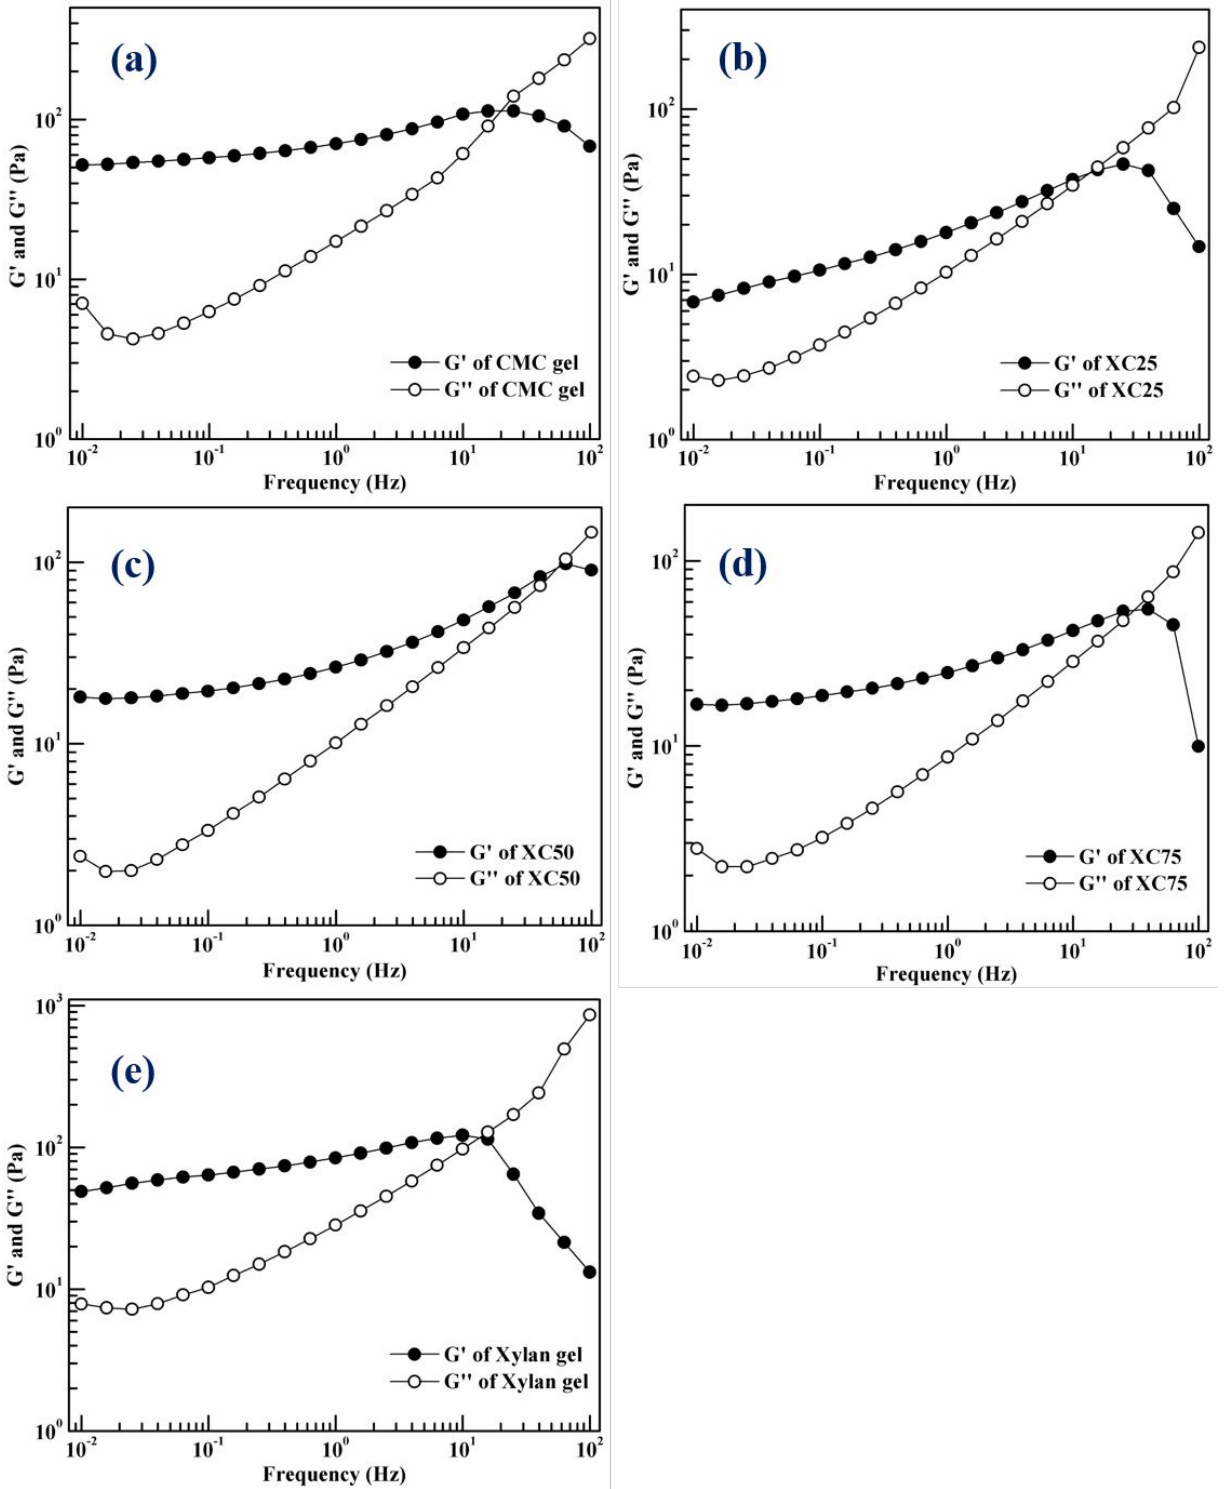

Figure S3. Frequency sweep of CMC-xylan hydrogels. (a) CMC gel, (b) XC25, (c) XC50, (d) XC75, (e) Xylan gel.

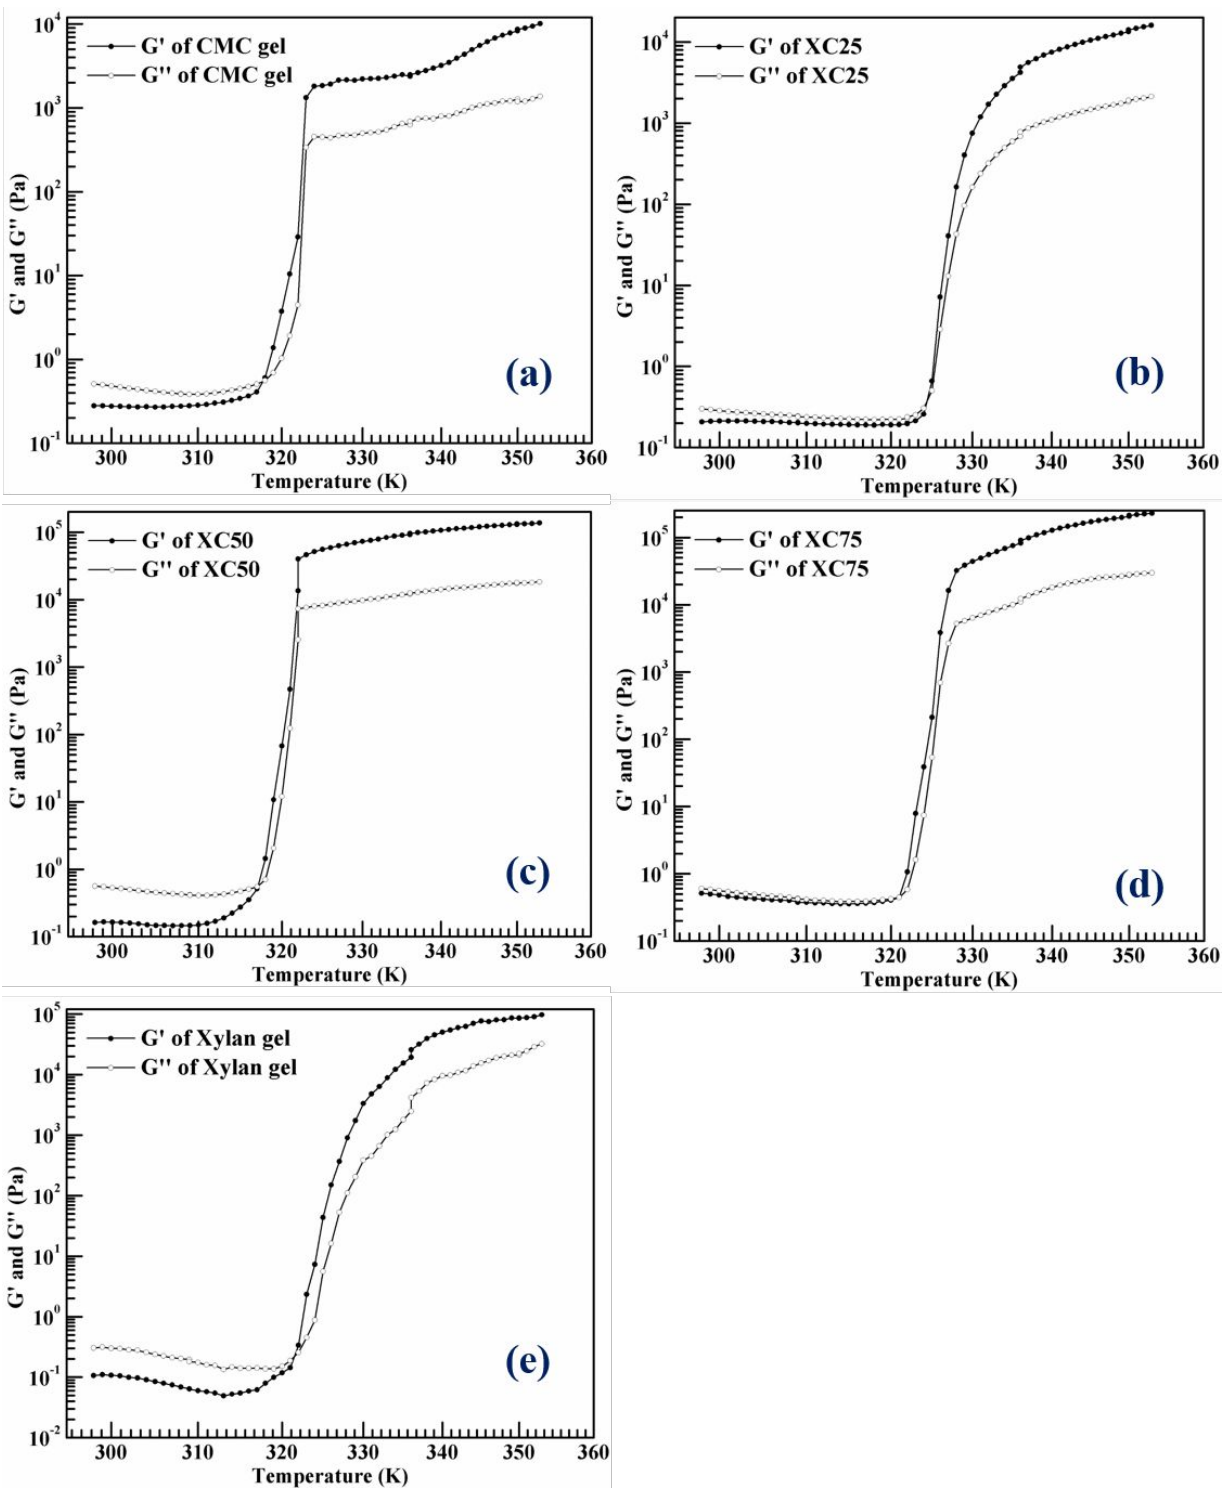

Figure S4. Temperature sweep of precursors. (a) CMC gel, (b) XC25, (c) XC50, (d) XC75, (e) Xylan gel.

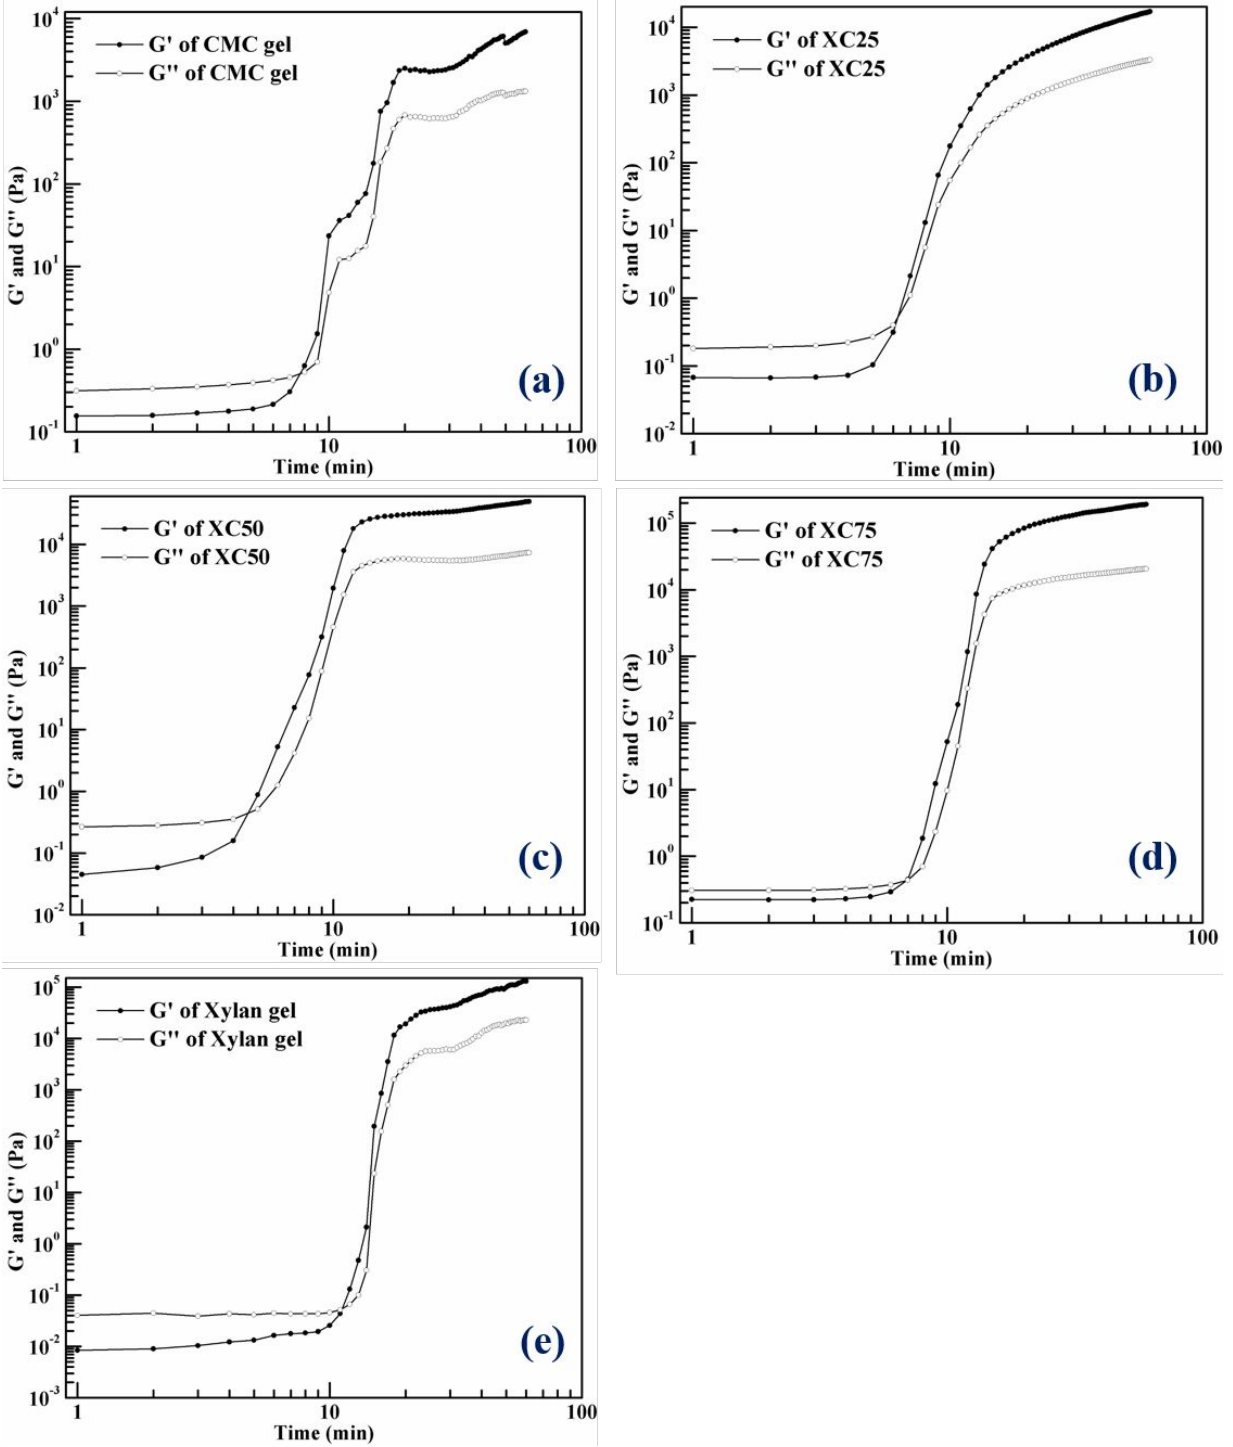

Figure S5. Time sweep of precursors. (a) CMC gel, (b) XC25, (c) XC50, (d) XC75, (e) Xylan gel.
